# Supplementary material for: Discrete trinuclear copper(ii) compounds as building blocks: the influence of the peripheral substituents on the magnetic coupling in oxamato-bridged complexes
Source: Royal Society of Chemistry journal article supplement (doi:10.1039/c4dt01180e), 2014-07-31
Supplement: c4dt01180e1.pdf [file c4dt01180e1.pdf]

**Supplementary Information**

**Discrete Trinuclear Copper(II) Compounds as Building Blocks:  
Influence of the Peripheral Substituents on the Magnetic Coupling  
in Oxamato-Bridged Complexes**

*Wdeson P. Barros,<sup>a</sup> Beatriz C. da Silva,<sup>a</sup> Natália V. Reis,<sup>a</sup> Cynthia L. M. Pereira,<sup>a,\*</sup> Antônio C. Doriguetto,<sup>b</sup> Joan Cano,<sup>c,d,\*</sup> Kleber R. Pirota,<sup>e</sup> Emerson F. Pedroso,<sup>f</sup> Miguel Julve,<sup>c</sup> and Humberto O. Stumpf,<sup>a,\*</sup>*

<sup>a</sup>Departamento de Química, ICEx, Universidade Federal de Minas Gerais, 31270-901, Belo Horizonte, MG, Brazil

<sup>b</sup>Instituto de Química, Universidade Federal de Alfenas, Alfenas, 37130-000, MG, Brazil

<sup>c</sup>Instituto de Ciencia Molecular (ICMol), Paterna (Valencia), 46980, Spain

<sup>d</sup>Fundació General de la Universitat de València (FGUV)

<sup>e</sup>Instituto de Física Gleb Wataghin, Universidade Estadual de Campinas, 13083-970, SP, Brazil

<sup>f</sup>Centro Federal de Educação Tecnológica de Minas Gerais, 30489-000, Belo Horizonte, MG, Brazil

\*Corresponding author. fax: +55 31 34095700

e-mail address: [cynthialopes@ufmg.br](mailto:cynthialopes@ufmg.br) (C.L.M.P.); [stumpf@ufmg.br](mailto:stumpf@ufmg.br) (H.O.S.);  
[joan.cano@uv.es](mailto:joan.cano@uv.es) (J.C.).

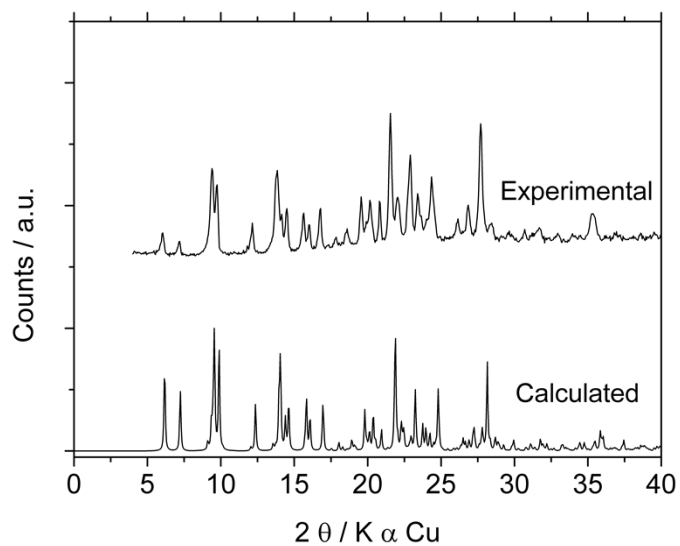

**Figure S1.** Experimental and calculated X-ray powder diffraction pattern (XPD) for  $(\text{Bu}_4\text{N})_2[\text{Cu}(\text{dmsO})_2\{\text{Cu}(\text{dnopba})\}_2](\text{dmsO})_4$  (**1**).

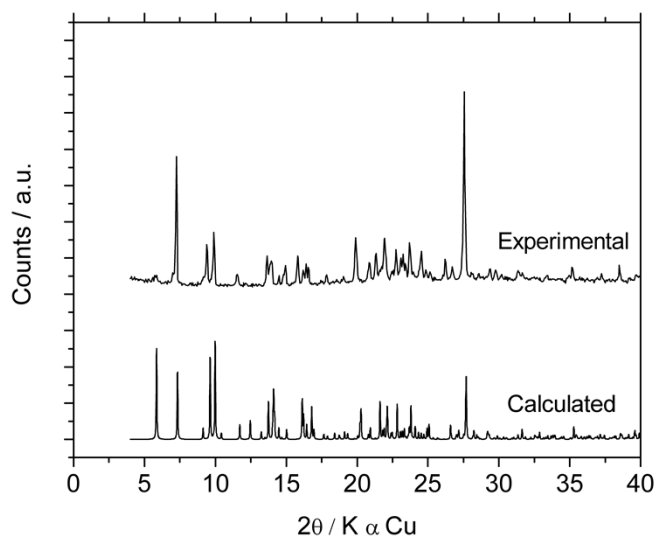

**Figure S2.** Experimental and calculated X-ray powder diffraction pattern (XPD) for  $(\text{Bu}_4\text{N})_2[\text{Cu}(\text{dmsO})_2\{\text{Cu}(\text{dcopba})\}_2(\text{dmsO})_2]$  (**2**)

**Table S1.** Selected bonds lengths (Å) and angles (°) for compounds **1** and **2**<sup>a,b</sup>

|                          | <b>1</b>  | <b>2</b>  |
|--------------------------|-----------|-----------|
| Cu1–O7                   | 2.300(2)  | 2.343(2)  |
| Cu1–O4                   | 2.043(2)  | 2.034(2)  |
| Cu1–N2                   | 1.940(2)  | 1.941(2)  |
| Cu1–N1                   | 1.913(2)  | 1.909(2)  |
| Cu1–O3                   | 1.942(1)  | 1.941(2)  |
| Cu2–O8                   | 2.323(2)  | 2.367(2)  |
| Cu2–O6                   | 1.996(1)  | 1.981(1)  |
| Cu2–O5                   | 1.967(1)  | 1.984(2)  |
| O3–Cu1–O7                | 92.91(6)  | 91.20(7)  |
| N1–Cu1–O7                | 94.54(6)  | 97.06(8)  |
| N2–Cu1–O7                | 95.90(6)  | 95.10(8)  |
| O4–Cu1–O7                | 99.03(6)  | 96.99(7)  |
| O3–Cu1–N2                | 163.88(7) | 166.22(8) |
| N1–Cu1–O4                | 159.93(7) | 160.55(8) |
| O3–Cu1–N1                | 83.97(7)  | 84.50(8)  |
| N1–Cu1–N2                | 81.90(7)  | 82.58(9)  |
| N2–Cu1–O4                | 82.06(7)  | 82.83(8)  |
| O4–Cu1–O3                | 109.87(6) | 108.58(7) |
| O6–Cu2–O8                | 97.57(6)  | 97.67(7)  |
| O6–Cu2–O(8) <sup>i</sup> | 82.43(6)  | 82.33(7)  |
| O5–Cu2–O8                | 93.02(6)  | 91.80(7)  |
| O5–Cu2–O(8) <sup>i</sup> | 86.98(6)  | 88.20(7)  |

|                          |          |          |
|--------------------------|----------|----------|
| O6–Cu2–O5                | 85.19(6) | 85.12(7) |
| O5–Cu2–O(6) <sup>i</sup> | 94.81(6) | 94.88(7) |
| C1–O2                    | 1.216(3) | 1.209(3) |
| C2–O1                    | 1.228(3) | 1.236(3) |
| C9–O6                    | 1.256(3) | 1.249(3) |
| C10–O5                   | 1.260(2) | 1.266(2) |
| C1–C2                    | 1.563(2) | 1.565(3) |
| C9–C10                   | 1.539(2) | 1.545(3) |

---

<sup>a</sup> Estimated standard deviations are given in parentheses. <sup>b</sup> Symmetry code: (i) = 2-x, 2-y, -z.
